# Supplementary material for: Influence of Preferments on the Physicochemical and Sensory Quality of Traditional Panettone
Source: MDPI journal article supplement (doi:10.3390/foods11172566), 2022-08-25
Supplement: s1 [file s1]

## File S1 Sensory evaluation by cata method and purchase intention test

Age: \_\_\_\_\_

Date: \_\_\_\_\_

Product name: **Panettone**

Sex: M ( ) F ( )

### Instruccions:

- You will receive four panettone samples with random codes.
- Please try the samples in the order you want and answer the question using the list of words presented.
- Rinse your mouth with a little water between samples.

Sample code: \_\_\_\_\_

How much do you like this panettone?

|                          |                          |                          |                          |                                     |                          |                          |                          |                          |
|--------------------------|--------------------------|--------------------------|--------------------------|-------------------------------------|--------------------------|--------------------------|--------------------------|--------------------------|
| <input type="checkbox"/> | <input type="checkbox"/> | <input type="checkbox"/> | <input type="checkbox"/> | <input checked="" type="checkbox"/> | <input type="checkbox"/> | <input type="checkbox"/> | <input type="checkbox"/> | <input type="checkbox"/> |
| I really<br>dislike      |                          |                          |                          | It does not<br>matter to me         |                          |                          |                          | I really<br>like         |

Would you buy this product?

|                                     |                          |                                     |                          |                                     |
|-------------------------------------|--------------------------|-------------------------------------|--------------------------|-------------------------------------|
| <input checked="" type="checkbox"/> | <input type="checkbox"/> | <input checked="" type="checkbox"/> | <input type="checkbox"/> | <input checked="" type="checkbox"/> |
| I wouldn't<br>buy it                |                          | Maybe i<br>would buy it             |                          | Yes, i<br>would                     |

Mark all the words that you consider appropriate to describe this panettone

#### SMELL

|                 |                          |
|-----------------|--------------------------|
| Alcohol smell   | <input type="checkbox"/> |
| Vanilla smell   | <input type="checkbox"/> |
| Fruit smell     | <input type="checkbox"/> |
| Fermented smell | <input type="checkbox"/> |
| Nutty smell     | <input type="checkbox"/> |

#### COLOR

|         |                          |
|---------|--------------------------|
| Shiny   | <input type="checkbox"/> |
| Pale    | <input type="checkbox"/> |
| TASTE   |                          |
| Sweet   | <input type="checkbox"/> |
| Bitter  | <input type="checkbox"/> |
| Sour    | <input type="checkbox"/> |
| Strange | <input type="checkbox"/> |

#### TEXTURE

|                    |                          |
|--------------------|--------------------------|
| Spongy             | <input type="checkbox"/> |
| Moist              | <input type="checkbox"/> |
| Greasy             | <input type="checkbox"/> |
| Soft               | <input type="checkbox"/> |
| Fibrous            | <input type="checkbox"/> |
| Dry/hard           | <input type="checkbox"/> |
| Stick (melcochado) | <input type="checkbox"/> |

Comments:

---

---

---

*Thank you for your participation!*

## File S2 Sensory evaluation preference ranking test

Age: \_\_\_\_\_

Date: \_\_\_\_\_

Product name: **Panettone**

Sex: M ( ) F ( )

### **Instruccions:**

- You will receive four panettone samples with random codes
- Please locate the samples by writing the codes in order from least to most preferred:

-----

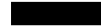

-----

-----

-----

-----

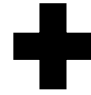

*Thank you for your participation!*

Contingency table built from CATA data:

| Products\Dimensions | Alcohol odor | Vanilla scent | Fruity smell | Fermented smell | Nutty aroma | Brilliant | Pale | Sweet | Bitter | Acid | Strange taste | Fluffy | Wet | Greasy | Gentle | Fibrous | Dry/hard | Sticky |
|---------------------|--------------|---------------|--------------|-----------------|-------------|-----------|------|-------|--------|------|---------------|--------|-----|--------|--------|---------|----------|--------|
| PB                  | 34           | 46            | 42           | 33              | 45          | 49        | 49   | 66    | 24     | 24   | 24            | 61     | 35  | 27     | 50     | 37      | 35       | 26     |
| PE                  | 27           | 44            | 49           | 34              | 56          | 36        | 59   | 71    | 18     | 21   | 21            | 59     | 32  | 23     | 50     | 42      | 31       | 21     |
| PMM                 | 34           | 38            | 55           | 31              | 42          | 33        | 63   | 60    | 16     | 26   | 22            | 51     | 28  | 25     | 50     | 34      | 42       | 21     |
| PC                  | 44           | 40            | 31           | 35              | 53          | 43        | 48   | 45    | 36     | 28   | 50            | 53     | 29  | 26     | 37     | 43      | 49       | 25     |
